# Supplementary material for: REG1A and RUNX3 Are Potential Biomarkers for Predicting the Risk of Diabetic Kidney Disease
Source: Front Endocrinol (Lausanne). 2022 Jul 22;13:935796. doi: 10.3389/fendo.2022.935796 (PMC9352862; doi:10.3389/fendo.2022.935796)
Supplement: Supplementary file 1 [file Table_1.xlsx]

## Sheet: NC
ID	Gender	Age	RUNX3 (fold)	REG1A (fold)
1	Male	67	1	1
2	Female	54	1.36	1.05
3	Male	53	1.29	0.74
4	Male	62	1.95	1.15
5	Male	57	1.2	0.46
6	Male	40	1.05	2.1
7	Male	45	1.38	0.99
8	Female	64	0.56	0.87
9	Male	47	0.59	1.3
10	Female	51	1.13	0.92
11	Female	55	0.45	1.8
12	Male	81	1	0.84
13	Female	56	1.19	1.3
14	Male	47	0.65	0.95
15	Female	61	1.07	1.02
16	Male	54	1.02	0.89
17	Female	54	0.99	1.07
18	Male	53	1.71	0.53
19	Male	52	0.6	1.09
20	Female	48	1.45	0.85
21	Male	42	0.69	0.94
22	Male	51	0.67	1.3
23	Female	55	1.4	0.34
24	Male	52	1.45	0.96
25	Female	54	1.21	1.07
26	Male	46	0.93	0.49
27	Male	65	0.74	0.77
28	Female	71	1.85	0.91
29	Female	56	0.59	0.96
30	Male	45	0.78	1.74
31	Female	55	0.48	0.86
32	Male	80	0.88	0.99
33	Male	58	1.5	1.25
34	Male	58	0.53	0.65
35	Female	82	1.18	0.84
36	Female	74	0.91	1.18
37	Male	79	1.42	0.81
38	Male	53	1.77	2.13
39	Female	53	1.38	0.86
40	Male	53	1.39	0.97
41	Female	58	1.29	0.47

## Sheet: DM no DKD
ID	Gender	Age	BMI	Time	FBG	C-P	HbA1c%	SCr	eGFR	UA	UACR	TG	TC	HDL-C	LDL-C	RUNX3(fold)	REG1A(fold)
42	Male	46	27.23	1	6.26	1.75	7.8	96	79.28	519	8.44	5.34	7.41	1.05	4.37	0.91	0.462
43	Male	37	25.89	2	5.34	2.19	8.5	80	108.73	302	2.67	3.63	7.32	1.18	4.54	1.48	1.81
44	Female	49	16.56	2	5.07	1.72	7.5	54	106.79	290	16.83	1.85	3.28	1.02	1.22	0.71	1.16
45	Male	54	22.29	3	8.87	1.65	5.1	55	112.46	268	10.4	0.75	3.04	1.29	1.32	1	0.75
46	Male	51	24.53	3	9.56	2.78	10.8	89	85.12	429	5.97	2.49	4.75	0.7	3.26	1.79	4.11
47	Female	54	24.6	4	6.27	3.32	7.4	58	100.47	514	5.34	5.44	4.69	0.75	1.42	1.75	1.85
48	Female	48	28.1	4	6.1	3.46	6.8	60	103.77	322	23.71	2.24	3.8	1.06	1.88	0.89	1.92
49	Male	46	30.12	5	6.86	2.48	8.8	67	109.41	300	7.44	1.74	3.84	0.75	2.54	1.05	2.96
50	Male	45	28.69	6	6.23	3.04	7	55	119.8	335	5.11	1.58	5.55	1.22	3.53	0.61	1.88
51	Male	50	24.77	6	5.55	2.65	5.7	75	101.6	369	76.25	1.12	2.95	0.96	1.67	1.62	2.37
52	Male	43	19.12	7	7.98	1.89	7.7	81	101.51	254	4.28	0.63	4.49	1.2	2.81	0.59	2.45
53	Male	54	22.53	8	10.38	1.12	10.5	61	107.62	404	3.59	1.68	7.04	1.05	4.67	0.88	2.77
54	Male	40	24.35	8	8.5	1.28	8.3	78	107.45	651	20.75	3.65	5.48	1.16	2.68	0.41	2.25
55	Female	78	25.55	8	10	2.74	8	65	77.3	397	14.25	2.71	6.53	1.47	4.23	0.75	1.78
56	Female	74	23.42	8	6.84	2.6	6.5	54	88.49	275	7.88	0.95	3.2	1.21	1.48	1.21	2.7
57	Male	75	24.12	9	4.76	0.23	6.1	78	83.44	354	4.18	0.87	3.77	1.53	2.09	0.85	2.42
58	Male	44	23.6	10	8.23	1.45	8.6	95	77.73	346	1.95	0.63	4.74	1.2	2.93	3.62	4.22
59	Female	57	23.24	10	4.76	2.35	6.5	63	94.85	403	4.27	1.03	3.3	1.21	1.54	0.95	2.84
60	Male	65	21.96	10	5.31	0.37	12.3	90	76.77	161	7.37	0.97	2.49	0.68	1.19	0.98	1.57
61	Male	44	26.27	10	12.78	1.64	8.9	65	112.18	337	6.08	2.94	4.88	0.92	2.95	1.4	0.91
62	Male	61	21.67	10	5.52	0.54	11	81	89.45	335	21.35	1.19	4.96	1.22	3.54	2.16	2.8
63	Male	54	23.83	10	12.04	2.45	11.4	95	78.28	447	5.08	1.59	3.9	0.75	2.65	0.37	2.79
64	Male	55	23.15	11	7.13	1.51	7.3	93	79.52	384	2.95	0.7	3.47	1.55	1.83	0.69	2.46
65	Male	56	26.87	12	6.31	2.31	8.6	84	88.5	492	4.03	2.62	5.45	0.72	3.37	0.75	4.42
66	Male	66	25.56	12	6.12	1.24	8.7	58	100.75	236	21.07	2.12	5.7	1.07	3.44	0.67	3.1
67	Female	56	23.42	13	12.3	2.15	12.4	41	110.77	402	21.1	1.17	5.37	1.26	3.46	1.3	3.76
68	Female	66	22.69	14	5.79	1.36	7.1	78	68.68	327	13.26	1.27	6.13	1.1	4.06	2.84	2.96
69	Male	61	25.99	14	10.3	2.28	10.3	78	92.71	422	22.38	0.46	1.92	0.97	0.89	1.28	3.12
70	Male	63	21.64	15	7.04	1.88	7.4	71	94.4	379	28.13	0.95	3.61	1.04	2.32	0.74	3.47
71	Female	54	22.1	15	6.85	0.86	10.1	45	109.36	274	3.86	1.26	5.93	1.2	3.96	1.66	3.31
72	Male	71	22.54	16	12.33	1.57	10.8	77	86.83	220	7.24	0.83	3.88	1.18	2.58	3.79	2.17
73	Female	61	23.43	17	7.18	1.46	8.6	74	75.26	265	10.37	1.52	5.51	1.52	3.06	1.58	2.34
74	Male	52	22.97	17	5.15	0.98	10.8	76	99.7	389	5.72	1.12	3.83	0.9	2.17	0.58	2.08
75	Female	60	25.24	17	7.09	2.14	9.6	43	106.24	392	18.93	2.29	3.99	1.19	1.9	0.66	1.93
76	Male	58	22.6	18	6.45	0.61	11.2	80	93.82	305	15.1	0.89	6.43	1.42	4.32	1.59	1.93
77	Female	68	21.23	18	6.23	1.89	6.6	59	90.61	340	3.42	1.31	3.76	1.47	1.67	1.01	0.71
78	Male	69	17.99	19	4.51	0.38	6.4	67	93.09	228	20.66	0.64	3.69	1.25	2.11	1.39	1.77
79	Female	62	21.15	20	8.27	3.13	6.7	62	93.16	211	2.76	2.14	4.84	1.24	2.55	1.75	1.03
80	Male	58	27.1	21	5.82	0.57	8.4	65	101.68	424	18.13	3.64	1.81	0.91	2.17	1.59	3.41
81	Male	53	23.86	10	6.78	1.38	10.2	64	107.25	394	4.16	0.94	3.79	1.01	2.32	0.85	2.22
82	Female	66	22.5	14	13.6	0.7	12.4	43	101.18	152	12.1	1.01	5.33	1.3	3.86	1.63	1.18
83	Female	59	21.49	15	11.8	1.37	10.8	56	98.5	287	8.21	1.92	6.23	1.04	4.63	1.65	3.11
84	Male	63	23.8	20	6.76	0.11	10.4	65	98.17	302	3.76	0.55	2.07	0.9	1.1	0.55	1.62
85	Male	61	29.07	3	4.84	1.98	5.5	74	94.5	370	11.95	0.86	3.7	1.06	2.48	1.19	1.21
86	Male	55	28.95	3	5.43	1.38	9.1	72	100.05	168	7.29	1.13	4.59	0.77	3.27	0.4	1.018
87	Male	42	24.34	4	5.88	2.22	6.3	89	90.23	468	2.46	0.91	2.66	0.92	1.36	1.32	2.38
88	Male	53	24.5	5	4.76	1.24	5.7	68	103.6	418	5.47	0.94	4.16	1.15	2.46	0.32	1.85
89	Male	46	22.3	6	11.29	2.59	9.4	82	98.1	277	6.41	2.62	536	0.83	3.84	2.89	2.53
90	Male	47	35.51	7	6.59	1.33	7.7	72	105.31	367	9.19	2.12	4.4	0.98	2.42	0.36	1.62
91	Male	70	22.05	8	5.47	1.24	7.5	67	92.44	279	19.21	0.9	3.61	1.30	2.14	0.79	3.32

## Sheet: DKD
ID	Gender	Age	BMI	Time	FBG	C-P	HbA1c%	SCr	eGFR	UA	UACR	TG	TC	HDL-C	LDL-C	RUNX3(fold)	REG1A(fold)
92	Male	26	27.5	1	10.96	3.11	11.3	76	119.68	707	164	5.35	4.88	0.45	1.78	0.42	3.25
93	Female	78	22.02	30	5.89	1.98	8.5	185	22.03	607	293.68	1.6	3.54	1.14	1.7	2.63	1.75
94	Female	52	27.69	10	8.53	0.64	10.2	56	109.52	164	368.34	1.58	3.98	1.03	2.13	2.44	2.49
95	Male	48	28.77	16	6.82	2.17	8.6	135	52.99	493	412.6	3.46	6.71	0.82	4.2	0.35	3.77
96	Male	40	19.88	8	5.2	0.62	10.2	140	53.3	464	648.24	0.8	6.33	1.1	4.89	3.08	2.11
97	Male	58	23.9	17	12.4	2.01	11.9	194	32.02	378	674.28	1.65	2.98	0.67	1.58	2.63	4.12
98	Male	56	25.44	21	10.4	3.02	8.9	107	66.52	456	726.42	1.8	3.52	0.9	1.84	1.55	4.34
99	Male	61	25.22	20	11.2	3.36	10.4	86	83.91	602	735.73	1.32	6.89	1.21	3.77	1.49	2.59
100	Female	75	21.47	30	5.98	0.12	11.5	95	50.55	356	802.58	1.03	5.42	0.97	4.12	0.85	0.68
101	Male	71	20.24	4	4.78	1.45	6.2	182	31.47	482	830.59	0.6	2.55	1.1	1.1	3.53	3.49
102	Male	72	21.5	12	10.2	0.59	14.5	183	24.91	401	883.42	0.96	3.96	1.28	2.2	3.17	3.93
103	Female	67	21.23	17	5.22	0.8	12.6	131	36.38	421	950.7	1.1	5.22	1.5	3.75	0.48	2.8
104	Male	56	21.56	3	7.34	1.19	10	92	79.88	235	1011.62	1.94	7.43	1.79	4.55	0.94	2.15
105	Male	72	25.15	14	8.67	0.48	9.1	96	67.93	283	1067.12	1.18	5.17	0.83	3.29	0.97	3.07
106	Male	50	25.51	13	4.04	0.24	5.6	65	107.55	515	1168.47	1.1	3.92	2.7	0.89	1.57	1.99
107	Male	51	31.43	7	7.85	1.04	7.7	66	106.21	519	1187.36	1.5	4.14	0.85	2.6	2.76	1.39
108	Male	68	24.24	15	9.68	3.55	12.4	259	20.99	542	1218.63	5.17	6.14	0.88	2.68	4.7	4.39
109	Male	74	21.61	9	7.93	1.74	9.2	81	81.64	453	1278.61	2.5	5.06	1.07	2.36	3.86	2.43
110	Female	65	22.96	17	11.7	4.02	10.4	105	48.02	403	1339.99	2.44	3.63	0.9	1.61	2.52	2.98
111	Male	67	24.69	10	8.18	0.55	8.8	89	79.61	347	1452.96	1.3	5.63	0.6	4.22	2.88	2.87
112	Female	66	29.72	14	7.39	1.89	7.1	329	12.02	333	1673.03	4.5	5.78	0.6	3.13	5.86	2.04
113	Female	68	22.78	12	9.35	2.67	10.4	111	43.38	386	1674.1	1.44	1.72	1.07	3.53	2.5	3.23
114	Female	75	23.56	24	6.29	0.74	9.6	49	102.28	343	1678.67	1.2	6.03	1.2	4.35	3.16	1.29
115	Female	66	27.6	10	7.7	2.24	8.9	149	31.2	373	1767.42	1.69	4.21	1.19	2.13	3.92	0.68
116	Male	57	24.62	3	7.48	0.31	13.4	76	95.59	357	1913.69	1.09	3.38	0.72	1.86	1.72	4.2
117	Male	49	26.64	15	7.82	0.97	8.8	62	118.88	449	1989.56	1.75	5.38	1.21	3.25	1.53	2.25
118	Female	74	23.55	16	8.29	1.71	12.6	128	32.86	450	2001.13	0.8	4.56	1.2	2.66	3.31	3.97
119	Male	57	21.52	18	8.2	4.54	9.7	99	10.56	614	2185.74	1.39	3.81	0.64	2.2	3.84	4.26
120	Male	55	20.28	3	4.52	0.61	7	204	30.65	342	2204.88	1.46	4.86	1	2.77	1.62	0.61
121	Female	65	18.75	16	7.32	5.12	8.9	288	14.2	360	2341.58	5.41	6.03	0.67	1.78	2.21	4.92
122	Male	47	22.98	9	6.29	3.72	9.7	143	49.8	321	2488.68	1.28	9.22	1.29	7.07	5.72	3.93
123	Male	67	25.35	20	6.75	1.41	12.8	149	41.11	375	2573.19	1.8	7.12	1.1	5.57	2.45	3.735
124	Male	58	28.27	20	9.86	2.21	7.9	188	33.11	637	2620.83	0.97	2.36	0.71	1.02	1.42	0.41
125	Male	53	29.41	15	5.11	3.88	8.6	143	47.74	512	2645.09	5.07	7.23	0.68	4.53	1.02	2.01
126	Male	51	19.61	6	4.7	0.37	6.8	168	39.93	441	2710.02	3.13	3.94	0.68	1.49	0.87	1.33
127	Female	40	25.34	9	4.81	0.43	6.5	48	118.42	262	2730.17	1.3	3.11	0.7	1.59	2.09	1.68
128	Male	60	21.97	22	6.2	0.9	6.1	301	18.55	377	2841.46	0.66	3.32	1.07	1.86	4.7	3.84
129	Male	56	24.45	12	8.28	0.66	9.8	178	36.02	241	2931.29	0.54	1.88	3.91	2.39	3.76	2.75
130	Male	58	25.03	20	4.26	0.99	8.7	286	19.94	384	3049.52	1.4	4.06	1.2	2.15	1.7	2.17
131	Female	46	23.88	18	8.34	1.73	11.9	77	80.14	319	3068.01	2.76	11.28	0.99	8.31	3.77	3.37
132	Male	73	24.22	20	5.32	3.55	8.3	133	32.72	485	3124.36	1.37	2.76	0.86	1.39	3.49	2.27
133	Male	79	22.64	12	6.1	0.71	8.9	68	84.51	235	3176.48	0.54	4.84	1.83	2.78	2.53	2.67
134	Female	41	19.55	12	8.21	0.61	7.7	79	80.76	205	3375.02	0.82	6.35	2.42	3.64	3.04	1.93
135	Male	56	28.54	2	5.15	3.2	7.2	190	33.2	396	3759.47	1.05	5.66	1.44	3.75	4.17	2.97
136	Male	55	18.72	28	9.91	1.16	9.7	132	52.09	416	3831.18	3.01	7.01	1.01	4.71	3.7	1.47
137	Male	48	24.53	2	7.17	3.13	6.2	450	12.39	502	3943.44	2.2	4.48	1.3	2.32	2.61	3.94
138	Male	52	20.91	12	8.63	3.04	6.6	126	55.91	314	4227.07	2.07	4.18	1.3	2.31	2.87	3.18
139	Female	53	19.9	8	5.02	1.27	11.8	119	44.86	432	4636.8	8.33	8.91	0.89	3.73	2.91	3.84
140	Male	56	28.25	8	5.08	3.08	6.5	165	39.03	323	5480.98	2.06	6.45	0.82	4.48	4.57	3.65
141	Male	57	28.54	18	6.45	4.9	6.2	178	35.76	326	5969.2	1.44	2.86	1.16	1.17	5.04	4.35
